# Supplementary material for: Geomagnetic Conjugate Observations of Ionospheric Disturbances in response to North Korea Underground Nuclear Explosion on 3 September 2017
Source: Copernicus journal article supplement (doi:10.5194/angeo-2018-122), 2018-11-08
Supplement: Supplementary file [file angeo-2018-122-AC2-supplement.zip]

## **Reviewer2**

This MS reports observations of ionospheric perturbations in response to North Korea underground nuclear explosion on September 2017. By using data from the ground and satellite facilities the ionospheric disturbances in the conjugate point have been detected. Similar observations were mentioned in the earlier publication by Gokhberg et al. (1990). The authors of the present MS propose that these perturbations are results of electrodynamic process caused by LAIC electric field penetration. The paper is concisely written and contains important results. However, the MS is not free from some deficiencies described below.

Line 62. Replace Gohberg by Gokhberg.

Line 63. Replace Mikhailv by Mikhailov.

Lines 213-215. Please replace the title of the reference to "Acoustic disturbance induced by underground nuclear explosion as a source of electrostatic turbulence in the magnetosphere".

Line 215. Replace P568 to P568-574

### **Response:**

We appreciate the reviewer for the valuable comment. We have corrected accordingly. We would like to thank the reviewer again for the valuable comments, which help a lot to improve the quality of the present paper. We hope that the reviewers will be satisfied with our responses and revisions, and we look forward to hearing from the reviewers soon.
