# Supplementary material for: Geomagnetic Conjugate Observations of Ionospheric Disturbances in response to North Korea Underground Nuclear Explosion on 3 September 2017
Source: Copernicus journal article supplement (doi:10.5194/angeo-2018-122), 2018-11-08

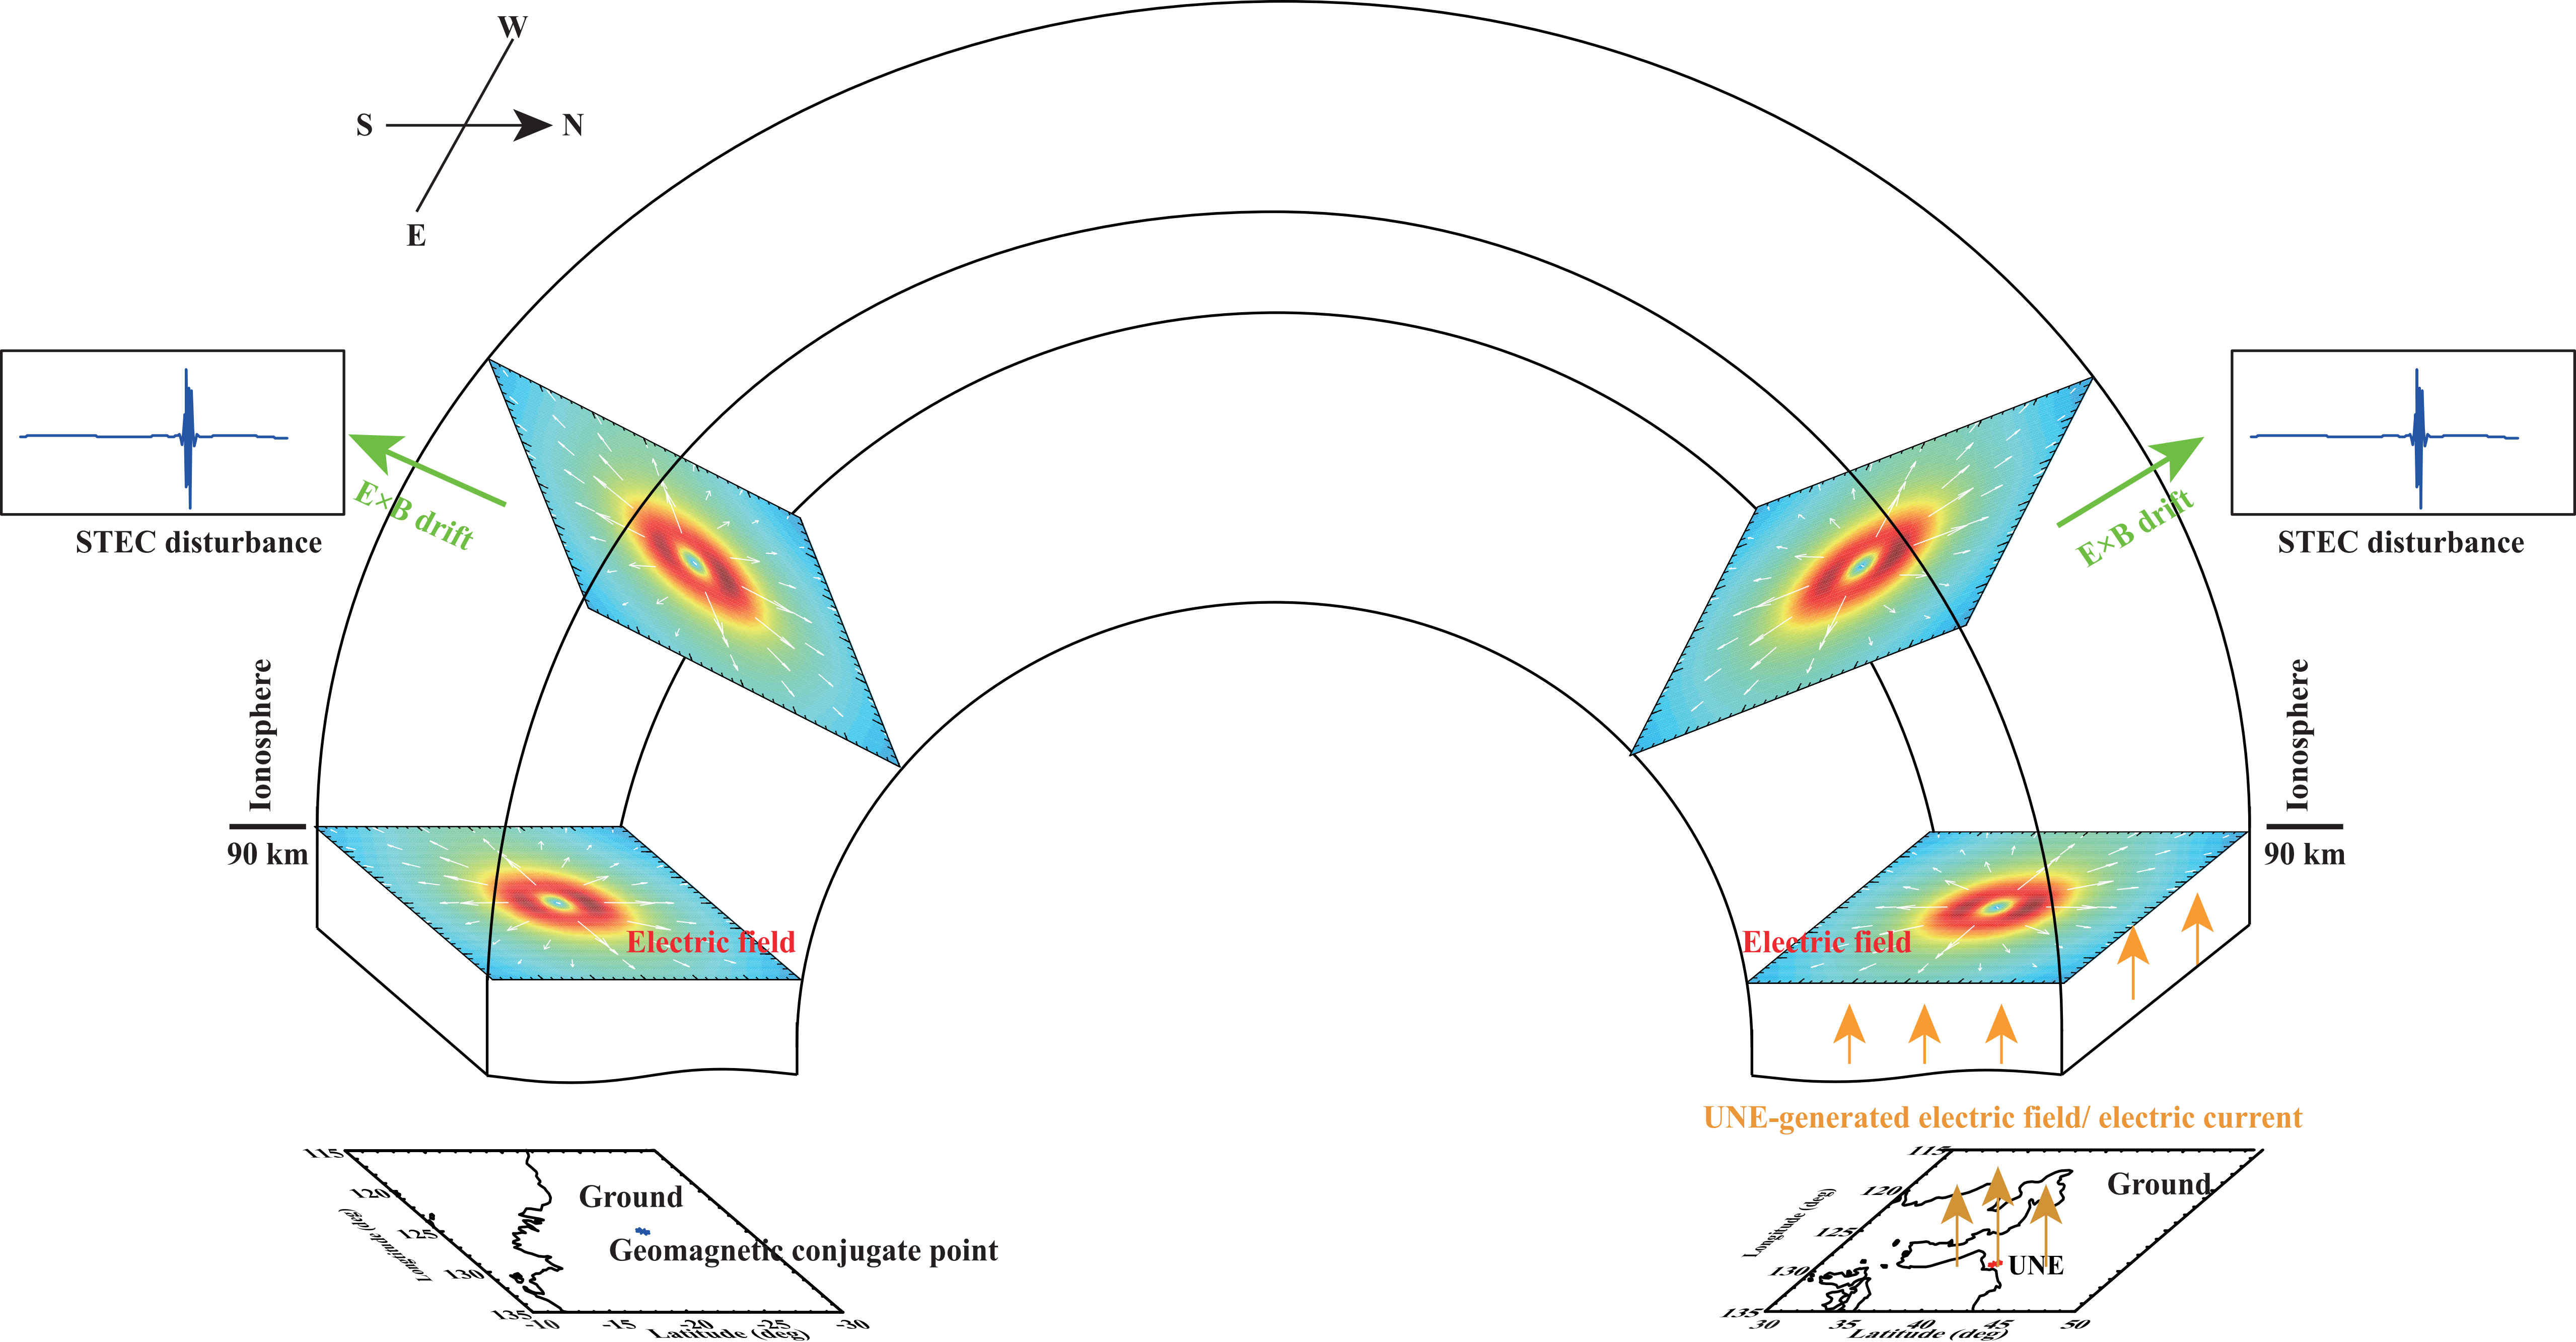

Supplement: Supplementary file [file angeo-2018-122-AC2-supplement.zip]
